# Supplementary material for: Risk Perception of COVID-19, Meaning-Based Resources and Psychological Well-Being amongst Healthcare Personnel: The Mediating Role of Coping
Source: MDPI journal article supplement (doi:10.3390/jcm9103225), 2020-10-08
Supplement: s1 [file s1]

## **Supplementary material**

The order in which the following variables and paths were removed from the initial model on a basis of modification indices:

- 1) The path from Meaning-based resources to Psychological well-being
- 2) The path from Meaning-based resources to Emotion-based coping
- 3) The path from Emotion-based coping to Psychological well-being
- 4) The variable Emotion-based coping along with its path from Risk perception
